# Supplementary material for: Genome-wide association analysis and functional annotation of positional candidate genes for feed conversion efficiency and growth rate in pigs
Source: PubMed Central journal article supplement (PMC5467825; doi:10.1371/journal.pone.0173482), 2017-06-12
Supplement: pone.0173482.s001.pdf [file pone.0173482.s001.pdf]

**S1 Table. Chromosomal position and minor allele frequency (MAF) of markers significantly (-log<sub>10</sub>[p-value] ≥ 4.7) associated with breeding value of days to 110 kg (BV\_D11) and breeding value of feed conversion ratio (BV\_FCR) in a commercial pig population (n = 940).**

| Trait   | Marker      | Chromosome<br>( <i>Sus scrofa</i> 10.2) | Position (bp) | Major<br>allele | Minor<br>allele | -log <sub>10</sub> (P-value) | MAF   |
|---------|-------------|-----------------------------------------|---------------|-----------------|-----------------|------------------------------|-------|
| BV_D110 | ALGA0000741 | 1                                       | 9984842       | G               | A               | 8.031                        | 0.170 |
| BV_D110 | H3GA0002001 | 1                                       | 81518643      | C               | A               | 5.717                        | 0.447 |
| BV_D110 | DRGA0001418 | 1                                       | 112480653     | C               | T               | 4.882                        | 0.491 |
| BV_D110 | ALGA0005287 | 1                                       | 112505390     | A               | G               | 4.882                        | 0.491 |
| BV_D110 | H3GA0002448 | 1                                       | 112726301     | T               | C               | 5.431                        | 0.496 |
| BV_D110 | ASGA0005521 | 1                                       | 214059952     | A               | G               | 5.191                        | 0.465 |
| BV_D110 | DIAS0004493 | 1                                       | 280835623     | G               | A               | 5.968                        | 0.193 |
| BV_D110 | H3GA0004624 | 1                                       | 292182409     | T               | C               | 5.295                        | 0.287 |
| BV_D110 | ALGA0009914 | 1                                       | 292235696     | T               | C               | 4.900                        | 0.360 |
| BV_D110 | ASGA0013123 | 3                                       | 5827367       | C               | A               | 5.075                        | 0.364 |
| BV_D110 | H3GA0008906 | 3                                       | 15634578      | G               | A               | 4.930                        | 0.345 |
| BV_D110 | ASGA0090908 | 3                                       | 18873908      | C               | T               | 5.302                        | 0.152 |
| BV_D110 | ALGA0102956 | 3                                       | 18876343      | G               | A               | 5.302                        | 0.152 |
| BV_D110 | MARC0036115 | 3                                       | 72009115      | C               | T               | 6.076                        | 0.343 |
| BV_D110 | MARC0050071 | 3                                       | 72016063      | A               | G               | 5.986                        | 0.346 |
| BV_D110 | ASGA0015479 | 3                                       | 102763903     | T               | C               | 4.769                        | 0.177 |
| BV_D110 | MARC0024866 | 3                                       | 138933442     | G               | A               | 5.253                        | 0.036 |
| BV_D110 | ALGA0022593 | 4                                       | 6456384       | A               | G               | 5.077                        | 0.079 |
| BV_D110 | ALGA0024359 | 4                                       | 33568631      | T               | C               | 4.861                        | 0.358 |
| BV_D110 | ALGA0024373 | 4                                       | 33718639      | G               | A               | 4.861                        | 0.358 |
| BV_D110 | ALGA0024372 | 4                                       | 33740194      | A               | G               | 4.861                        | 0.358 |
| BV_D110 | MARC0017785 | 4                                       | 33903588      | G               | A               | 4.952                        | 0.470 |
| BV_D110 | H3GA0012460 | 4                                       | 34124914      | C               | T               | 5.441                        | 0.376 |
| BV_D110 | ASGA0019136 | 4                                       | 85824398      | T               | C               | 4.922                        | 0.362 |
| BV_D110 | ISU10000732 | 4                                       | 111821142     | G               | A               | 5.162                        | 0.069 |
| BV_D110 | ALGA0027450 | 4                                       | 112112443     | T               | C               | 5.360                        | 0.065 |
| BV_D110 | MARC0052776 | 5                                       | 35527233      | C               | A               | 4.873                        | 0.238 |
| BV_D110 | H3GA0017183 | 5                                       | 99245749      | G               | A               | 5.494                        | 0.150 |
| BV_D110 | ASGA0084609 | 5                                       | 99603393      | T               | G               | 4.795                        | 0.126 |
| BV_D110 | ALGA0108236 | 6                                       | 80473215      | G               | A               | 5.102                        | 0.444 |
| BV_D110 | ALGA0035847 | 6                                       | 80577487      | A               | C               | 6.363                        | 0.443 |
| BV_D110 | ALGA0049088 | 8                                       | 114685369     | C               | T               | 5.471                        | 0.354 |
| BV_D110 | ASGA0091541 | 8                                       | 116042287     | A               | G               | 5.609                        | 0.404 |
| BV_D110 | ALGA0049119 | 8                                       | 117393889     | A               | G               | 4.789                        | 0.330 |
| BV_D110 | ASGA0044603 | 9                                       | 135580018     | A               | G               | 5.095                        | 0.052 |
| BV_D110 | ASGA0099386 | 9                                       | 151674877     | A               | C               | 5.083                        | 0.037 |
| BV_D110 | ASGA0085614 | 9                                       | 151691472     | C               | T               | 5.083                        | 0.037 |
| BV_D110 | ASGA0103446 | 10                                      | 70669410      | T               | G               | 5.158                        | 0.276 |
| BV_D110 | ASGA0087707 | 10                                      | 72261049      | C               | T               | 5.413                        | 0.356 |
| BV_D110 | ALGA0060013 | 10                                      | 72375760      | G               | T               | 6.322                        | 0.437 |
| BV_D110 | H3GA0030777 | 10                                      | 72766001      | G               | A               | 6.922                        | 0.427 |
| BV_D110 | ALGA0119579 | 10                                      | 73404291      | A               | G               | 5.530                        | 0.289 |
| BV_D110 | ASGA0049546 | 11                                      | 7107145       | G               | A               | 4.974                        | 0.286 |
| BV_D110 | ALGA0060585 | 11                                      | 7134345       | C               | A               | 5.481                        | 0.361 |
| BV_D110 | ALGA0061414 | 11                                      | 23577849      | C               | T               | 4.898                        | 0.403 |
| BV_D110 | ASGA0103038 | 12                                      | 2690149       | C               | T               | 6.916                        | 0.130 |
| BV_D110 | MARC0027759 | 12                                      | 57625866      | C               | T               | 5.406                        | 0.448 |
| BV_D110 | DRGA0012390 | 13                                      | 57608490      | T               | C               | 5.741                        | 0.214 |
| BV_D110 | DRGA0012397 | 13                                      | 58087990      | A               | G               | 5.368                        | 0.246 |
| BV_D110 | DRGA0012399 | 13                                      | 58159422      | G               | A               | 5.689                        | 0.209 |

S1 Table. Continued

| Trait   | Marker      | Chromosome<br>( <i>Sus scrofa</i> 10.2) | Position (bp) | Major<br>allele | Minor<br>allele | $-\log_{10}(\text{P-value})$ | MAF   |
|---------|-------------|-----------------------------------------|---------------|-----------------|-----------------|------------------------------|-------|
| BV_D110 | M1GA0017545 | 13                                      | 59460430      | G               | A               | 5.679                        | 0.252 |
| BV_D110 | ALGA0073466 | 13                                      | 199927172     | T               | C               | 5.353                        | 0.058 |
| BV_D110 | ALGA0079898 | 14                                      | 99669710      | C               | T               | 5.390                        | 0.294 |
| BV_D110 | ALGA0081112 | 14                                      | 121527590     | C               | T               | 5.450                        | 0.441 |
| BV_D110 | DRGA0014640 | 14                                      | 136239246     | T               | G               | 6.592                        | 0.102 |
| BV_D110 | MARC0036947 | 15                                      | 2640639       | C               | T               | 6.921                        | 0.151 |
| BV_D110 | ALGA0115976 | 15                                      | 2798633       | A               | C               | 6.885                        | 0.247 |
| BV_D110 | ALGA0113899 | 15                                      | 2835746       | C               | T               | 6.784                        | 0.181 |
| BV_D110 | MARC0072361 | 15                                      | 2843921       | T               | C               | 7.753                        | 0.141 |
| BV_D110 | ALGA0083417 | 15                                      | 3322649       | G               | A               | 8.146                        | 0.144 |
| BV_D110 | DRGA0014782 | 15                                      | 3449792       | T               | C               | 5.424                        | 0.322 |
| BV_D110 | MARC0034611 | 15                                      | 4129181       | C               | T               | 5.224                        | 0.131 |
| BV_D110 | MARC0034674 | 15                                      | 4405843       | C               | T               | 5.247                        | 0.397 |
| BV_D110 | MARC0033141 | 15                                      | 7988656       | C               | T               | 5.004                        | 0.239 |
| BV_D110 | MARC0092322 | 15                                      | 98033621      | G               | C               | 5.244                        | 0.064 |
| BV_D110 | ALGA0090172 | 16                                      | 35245008      | G               | A               | 5.057                        | 0.256 |
| BV_D110 | SIRI0000298 | 16                                      | 35311791      | A               | G               | 5.057                        | 0.256 |
| BV_D110 | ASGA0073002 | 16                                      | 35661077      | T               | G               | 5.028                        | 0.209 |
| BV_D110 | INRA0052777 | 17                                      | 16899381      | A               | G               | 5.370                        | 0.034 |
| BV_D110 | MARC0061919 | 17                                      | 16920977      | G               | A               | 4.902                        | 0.031 |
| BV_D110 | ALGA0100254 | X                                       | 138410450     | C               | T               | 5.384                        | 0.040 |
| BV_FCR  | H3GA0002102 | 1                                       | 84686166      | G               | A               | 6.324                        | 0.156 |
| BV_FCR  | ALGA0007869 | 1                                       | 239852452     | T               | C               | 5.942                        | 0.133 |
| BV_FCR  | ALGA0004358 | 1                                       | 83904334      | T               | C               | 5.891                        | 0.204 |
| BV_FCR  | ASGA0003509 | 1                                       | 84055266      | A               | G               | 5.891                        | 0.204 |
| BV_FCR  | MARC0014911 | 1                                       | 83260076      | G               | T               | 5.859                        | 0.207 |
| BV_FCR  | ASGA0003476 | 1                                       | 83283489      | A               | G               | 5.859                        | 0.207 |
| BV_FCR  | DRGA0001159 | 1                                       | 83357328      | A               | G               | 5.744                        | 0.235 |
| BV_FCR  | INRA0002912 | 1                                       | 83477121      | T               | C               | 5.699                        | 0.236 |
| BV_FCR  | ASGA0003483 | 1                                       | 83498280      | G               | A               | 5.699                        | 0.236 |
| BV_FCR  | ALGA0004354 | 1                                       | 83753095      | T               | G               | 5.699                        | 0.236 |
| BV_FCR  | ASGA0003503 | 1                                       | 84007856      | C               | T               | 5.699                        | 0.236 |
| BV_FCR  | ASGA0003506 | 1                                       | 84029992      | A               | G               | 5.676                        | 0.210 |
| BV_FCR  | ASGA0003481 | 1                                       | 83444533      | T               | C               | 5.632                        | 0.211 |
| BV_FCR  | H3GA0002049 | 1                                       | 83540558      | T               | C               | 5.632                        | 0.211 |
| BV_FCR  | H3GA0002051 | 1                                       | 83812379      | C               | T               | 5.632                        | 0.211 |
| BV_FCR  | MARC0091785 | 1                                       | 230057074     | C               | T               | 5.107                        | 0.216 |
| BV_FCR  | MARC0100294 | 1                                       | 84107174      | G               | A               | 5.033                        | 0.153 |
| BV_FCR  | ASGA0005720 | 1                                       | 242311874     | T               | C               | 4.992                        | 0.114 |
| BV_FCR  | MARC0056239 | 1                                       | 242741853     | C               | T               | 4.992                        | 0.112 |
| BV_FCR  | MARC0067813 | 1                                       | 242886911     | C               | T               | 4.992                        | 0.112 |
| BV_FCR  | MARC0013705 | 1                                       | 103129617     | C               | T               | 4.887                        | 0.399 |
| BV_FCR  | ALGA0000741 | 1                                       | 9984842       | G               | A               | 4.878                        | 0.170 |
| BV_FCR  | MARC0025200 | 1                                       | 93730143      | A               | G               | 4.768                        | 0.412 |
| BV_FCR  | ALGA0004441 | 1                                       | 84640944      | C               | T               | 4.759                        | 0.122 |
| BV_FCR  | ALGA0010607 | 1                                       | 302880686     | T               | C               | 4.750                        | 0.200 |
| BV_FCR  | ALGA0114773 | 2                                       | 152813354     | A               | C               | 5.708                        | 0.482 |
| BV_FCR  | M1GA0004469 | 3                                       | 79317961      | C               | T               | 5.332                        | 0.339 |
| BV_FCR  | ASGA0085168 | 3                                       | 62155304      | C               | G               | 5.006                        | 0.429 |
| BV_FCR  | ASGA0089538 | 3                                       | 75159934      | A               | G               | 4.995                        | 0.117 |
| BV_FCR  | H3GA0013204 | 4                                       | 88311790      | G               | A               | 7.961                        | 0.416 |
| BV_FCR  | ALGA0026233 | 4                                       | 89118147      | C               | T               | 6.913                        | 0.454 |
| BV_FCR  | ALGA0026230 | 4                                       | 89104182      | A               | G               | 6.841                        | 0.463 |
| BV_FCR  | ALGA0024222 | 4                                       | 30060941      | C               | T               | 6.721                        | 0.485 |
| BV_FCR  | M1GA0005738 | 4                                       | 15395576      | C               | T               | 6.693                        | 0.053 |

S1 Table. Continued

| Trait  | Marker      | Chromosome<br>( <i>Sus scrofa</i> 10.2) | Position (bp) | Major<br>allele | Minor<br>allele | $-\log_{10}(\text{P-value})$ | MAF   |
|--------|-------------|-----------------------------------------|---------------|-----------------|-----------------|------------------------------|-------|
| BV_FCR | ALGA0026204 | 4                                       | 87021547      | C               | A               | 6.469                        | 0.461 |
| BV_FCR | ALGA0023631 | 4                                       | 17248104      | A               | G               | 6.293                        | 0.130 |
| BV_FCR | MARC0000845 | 4                                       | 86747415      | G               | A               | 6.260                        | 0.346 |
| BV_FCR | MARC0006674 | 4                                       | 30077359      | T               | C               | 6.205                        | 0.483 |
| BV_FCR | ASGA0020471 | 4                                       | 88358606      | G               | A               | 5.728                        | 0.473 |
| BV_FCR | ASGA0020473 | 4                                       | 88385240      | T               | C               | 5.728                        | 0.473 |
| BV_FCR | ALGA0025816 | 4                                       | 78608608      | T               | C               | 5.722                        | 0.444 |
| BV_FCR | MARC0021448 | 4                                       | 78622798      | T               | C               | 5.722                        | 0.444 |
| BV_FCR | ASGA0020148 | 4                                       | 78641029      | C               | T               | 5.722                        | 0.444 |
| BV_FCR | ALGA0026374 | 4                                       | 93378763      | T               | C               | 5.692                        | 0.215 |
| BV_FCR | ASGA0019062 | 4                                       | 27684348      | A               | C               | 5.545                        | 0.478 |
| BV_FCR | M1GA0005974 | 4                                       | 82154248      | C               | T               | 5.383                        | 0.467 |
| BV_FCR | ASGA0093554 | 4                                       | 16069475      | G               | A               | 5.331                        | 0.370 |
| BV_FCR | ASGA0090485 | 4                                       | 16070229      | A               | G               | 5.331                        | 0.370 |
| BV_FCR | ALGA0116077 | 4                                       | 86261296      | G               | A               | 5.294                        | 0.310 |
| BV_FCR | ASGA0020466 | 4                                       | 87889676      | T               | G               | 5.271                        | 0.477 |
| BV_FCR | MARC0009527 | 4                                       | 88437516      | A               | C               | 5.120                        | 0.254 |
| BV_FCR | CASI0007993 | 4                                       | 88762691      | A               | G               | 5.120                        | 0.254 |
| BV_FCR | ASGA0020454 | 4                                       | 87007876      | G               | A               | 5.094                        | 0.224 |
| BV_FCR | ASGA0020384 | 4                                       | 83846382      | A               | G               | 4.959                        | 0.465 |
| BV_FCR | MARC0083264 | 4                                       | 89273187      | G               | A               | 4.916                        | 0.357 |
| BV_FCR | ALGA0108541 | 4                                       | 133102015     | A               | C               | 4.910                        | 0.123 |
| BV_FCR | ALGA0024155 | 4                                       | 28144078      | G               | A               | 4.772                        | 0.221 |
| BV_FCR | ASGA0021673 | 4                                       | 114804404     | T               | C               | 4.745                        | 0.451 |
| BV_FCR | ASGA0018763 | 4                                       | 18153487      | T               | C               | 4.735                        | 0.485 |
| BV_FCR | M1GA0008166 | 5                                       | 106059180     | G               | T               | 7.521                        | 0.143 |
| BV_FCR | ASGA0026626 | 5                                       | 90128642      | T               | C               | 6.800                        | 0.366 |
| BV_FCR | ASGA0027134 | 5                                       | 105954521     | G               | A               | 6.618                        | 0.482 |
| BV_FCR | DRGA0006468 | 5                                       | 108606349     | A               | G               | 5.419                        | 0.078 |
| BV_FCR | DRGA0006480 | 5                                       | 108885783     | G               | A               | 5.419                        | 0.078 |
| BV_FCR | DRGA0006449 | 5                                       | 109415562     | A               | G               | 5.419                        | 0.078 |
| BV_FCR | ASGA0024351 | 5                                       | 9942508       | T               | C               | 4.769                        | 0.498 |
| BV_FCR | MARC0031617 | 6                                       | 127646479     | A               | G               | 6.577                        | 0.483 |
| BV_FCR | ASGA0028724 | 6                                       | 78297229      | A               | G               | 6.443                        | 0.351 |
| BV_FCR | ALGA0035847 | 6                                       | 80577487      | A               | C               | 6.434                        | 0.443 |
| BV_FCR | ALGA0108236 | 6                                       | 80473215      | G               | A               | 5.939                        | 0.444 |
| BV_FCR | MARC0083933 | 6                                       | 78053471      | G               | A               | 5.820                        | 0.423 |
| BV_FCR | ASGA0095713 | 6                                       | 7643426       | T               | C               | 5.802                        | 0.269 |
| BV_FCR | ASGA0028717 | 6                                       | 78093507      | T               | C               | 5.642                        | 0.432 |
| BV_FCR | M1GA0025424 | 6                                       | 149384762     | G               | A               | 5.375                        | 0.247 |
| BV_FCR | ASGA0099240 | 6                                       | 78503421      | C               | T               | 5.220                        | 0.426 |
| BV_FCR | MARC0018089 | 6                                       | 79884591      | C               | T               | 5.136                        | 0.285 |
| BV_FCR | ALGA0037010 | 6                                       | 130083282     | A               | G               | 4.793                        | 0.246 |
| BV_FCR | ALGA0124052 | 6                                       | 80979535      | G               | A               | 4.717                        | 0.094 |
| BV_FCR | ALGA0045445 | 7                                       | 125434386     | A               | G               | 6.827                        | 0.065 |
| BV_FCR | ALGA0043503 | 7                                       | 95646427      | A               | G               | 5.807                        | 0.185 |
| BV_FCR | ASGA0037781 | 8                                       | 10172634      | G               | A               | 6.342                        | 0.473 |
| BV_FCR | ASGA0041689 | 9                                       | 13309995      | A               | C               | 6.614                        | 0.466 |
| BV_FCR | ALGA0118156 | 9                                       | 7629819       | G               | A               | 6.035                        | 0.347 |
| BV_FCR | ALGA0055001 | 9                                       | 133403289     | A               | G               | 5.845                        | 0.285 |
| BV_FCR | H3GA0028548 | 9                                       | 145215254     | A               | G               | 5.549                        | 0.223 |
| BV_FCR | H3GA0055365 | 9                                       | 7629459       | A               | G               | 5.373                        | 0.377 |
| BV_FCR | ALGA0122939 | 9                                       | 132566139     | A               | G               | 5.099                        | 0.371 |
| BV_FCR | ALGA0060013 | 10                                      | 72375760      | G               | T               | 5.156                        | 0.437 |
| BV_FCR | ALGA0057031 | 10                                      | 12263111      | C               | T               | 5.080                        | 0.112 |

S1 Table. Continued

| Trait  | Marker      | Chromosome<br>( <i>Sus scrofa</i> 10.2) | Position (bp) | Major<br>allele | Minor<br>allele | $-\log_{10}(\text{P-value})$ | MAF   |
|--------|-------------|-----------------------------------------|---------------|-----------------|-----------------|------------------------------|-------|
| BV_FCR | H3GA0029253 | 10                                      | 13119118      | C               | T               | 4.819                        | 0.313 |
| BV_FCR | ALGA0061169 | 11                                      | 18669144      | A               | C               | 5.603                        | 0.324 |
| BV_FCR | MARC0049886 | 11                                      | 23923832      | G               | A               | 5.600                        | 0.383 |
| BV_FCR | DRGA0010905 | 11                                      | 15846590      | C               | A               | 4.713                        | 0.444 |
| BV_FCR | MARC0021670 | 12                                      | 37005248      | A               | G               | 5.894                        | 0.050 |
| BV_FCR | H3GA0034902 | 12                                      | 58064000      | A               | G               | 5.023                        | 0.372 |
| BV_FCR | ASGA0101792 | 12                                      | 39587325      | G               | T               | 4.810                        | 0.326 |
| BV_FCR | DRGA0011805 | 12                                      | 51938171      | G               | T               | 4.716                        | 0.161 |
| BV_FCR | M1GA0025611 | 12                                      | 52131264      | C               | T               | 4.716                        | 0.161 |
| BV_FCR | ALGA0073977 | 13                                      | 213948108     | C               | T               | 5.857                        | 0.116 |
| BV_FCR | MARC0029581 | 13                                      | 15811761      | A               | G               | 5.601                        | 0.071 |
| BV_FCR | H3GA0041606 | 14                                      | 104899055     | T               | C               | 6.675                        | 0.098 |
| BV_FCR | ASGA0061606 | 14                                      | 14998570      | T               | C               | 5.332                        | 0.104 |
| BV_FCR | DRGA0013766 | 14                                      | 30612689      | C               | T               | 4.717                        | 0.182 |
| BV_FCR | MARC0015113 | 15                                      | 146404317     | A               | G               | 7.400                        | 0.063 |
| BV_FCR | MARC0054210 | 15                                      | 61968193      | G               | A               | 6.461                        | 0.081 |
| BV_FCR | ALGA0119312 | 15                                      | 149350761     | G               | A               | 6.271                        | 0.184 |
| BV_FCR | ALGA0110207 | 15                                      | 149318714     | A               | G               | 5.899                        | 0.195 |
| BV_FCR | INRA0058294 | 15                                      | 151595855     | T               | C               | 5.694                        | 0.356 |
| BV_FCR | MARC0082913 | 15                                      | 49748365      | G               | T               | 5.028                        | 0.071 |
| BV_FCR | MARC0034674 | 15                                      | 4405843       | C               | T               | 4.793                        | 0.397 |
| BV_FCR | DRGA0016308 | 16                                      | 72717040      | G               | A               | 6.170                        | 0.080 |
| BV_FCR | MARC0015715 | 16                                      | 81970866      | C               | T               | 5.035                        | 0.193 |
| BV_FCR | ASGA0098951 | 16                                      | 74560093      | T               | C               | 4.765                        | 0.267 |
| BV_FCR | ASGA0076498 | 17                                      | 37552167      | G               | A               | 5.308                        | 0.242 |
| BV_FCR | ASGA0103482 | 17                                      | 11648411      | T               | C               | 5.226                        | 0.462 |
| BV_FCR | ALGA0114599 | 17                                      | 50466682      | T               | C               | 5.159                        | 0.107 |
| BV_FCR | ASGA0085139 | 17                                      | 50468152      | T               | G               | 5.159                        | 0.107 |
| BV_FCR | M1GA0023780 | X                                       | 125569642     | G               | A               | 8.267                        | 0.111 |
| BV_FCR | ALGA0111101 | X                                       | 2581887       | T               | C               | 6.708                        | 0.424 |
| BV_FCR | ALGA0106978 | X                                       | 2556821       | T               | C               | 6.463                        | 0.396 |
| BV_FCR | ASGA0081152 | X                                       | 45539525      | T               | C               | 6.001                        | 0.469 |
| BV_FCR | DRGA0017254 | X                                       | 45561094      | C               | T               | 6.001                        | 0.469 |
| BV_FCR | H3GA0051784 | X                                       | 45972443      | C               | T               | 5.839                        | 0.415 |
| BV_FCR | ALGA0099925 | X                                       | 110666451     | G               | A               | 5.822                        | 0.369 |
| BV_FCR | ASGA0081451 | X                                       | 125698970     | G               | A               | 5.499                        | 0.126 |
| BV_FCR | ALGA0099728 | X                                       | 45914845      | G               | A               | 5.473                        | 0.207 |
| BV_FCR | ALGA0099288 | X                                       | 8692219       | C               | T               | 5.176                        | 0.469 |
| BV_FCR | MARC0056935 | X                                       | 125199118     | G               | A               | 5.115                        | 0.134 |
| BV_FCR | M1GA0023703 | X                                       | 42908366      | T               | C               | 5.115                        | 0.216 |
| BV_FCR | ASGA0080749 | X                                       | 8718698       | C               | T               | 5.087                        | 0.447 |
| BV_FCR | ALGA0100103 | X                                       | 125294839     | C               | T               | 4.902                        | 0.134 |
| BV_FCR | ALGA0099572 | X                                       | 37678424      | A               | G               | 4.766                        | 0.395 |
